# Supplementary material
Source: Springer Nature journal article supplement (https://www.springermedizin.de/resource/supplementary/12889_2011_3296_MOESM1_ESM.pdf/9488630)

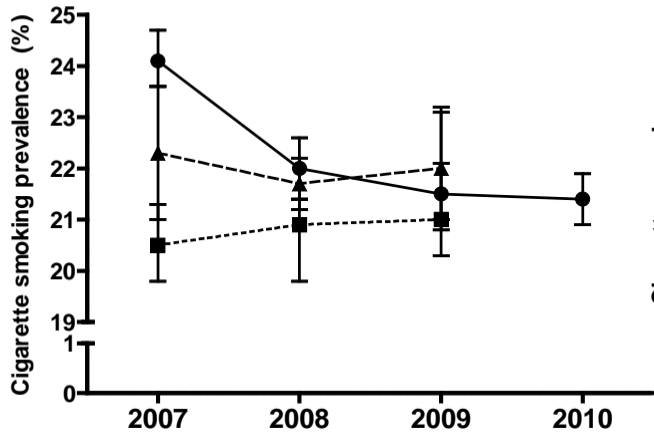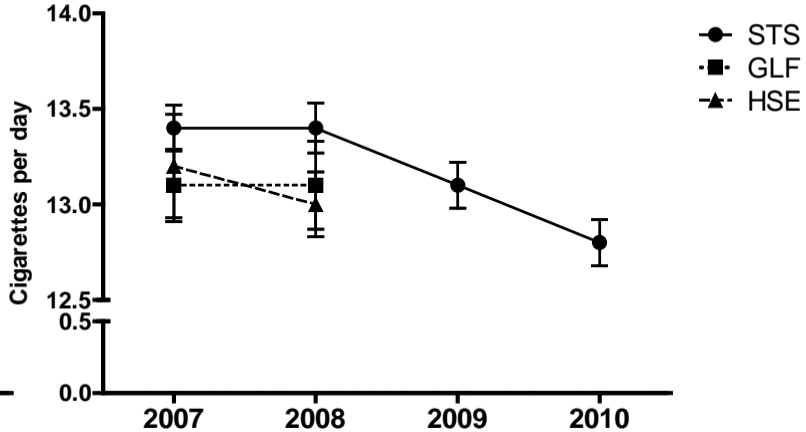

Supplement: MOESM1 [file 9488630]
